# Supplementary material for: In Vivo Genome and Methylome Adaptation of cag-Negative Helicobacter pylori during Experimental Human Infection
Source: PubMed Central journal article supplement (PMC7448279; doi:10.1128/mbio.01803-20), 2020-08-25
Supplement: mBio.01803-20-sf003.pdf [file mBio.01803-20-sf003.pdf]

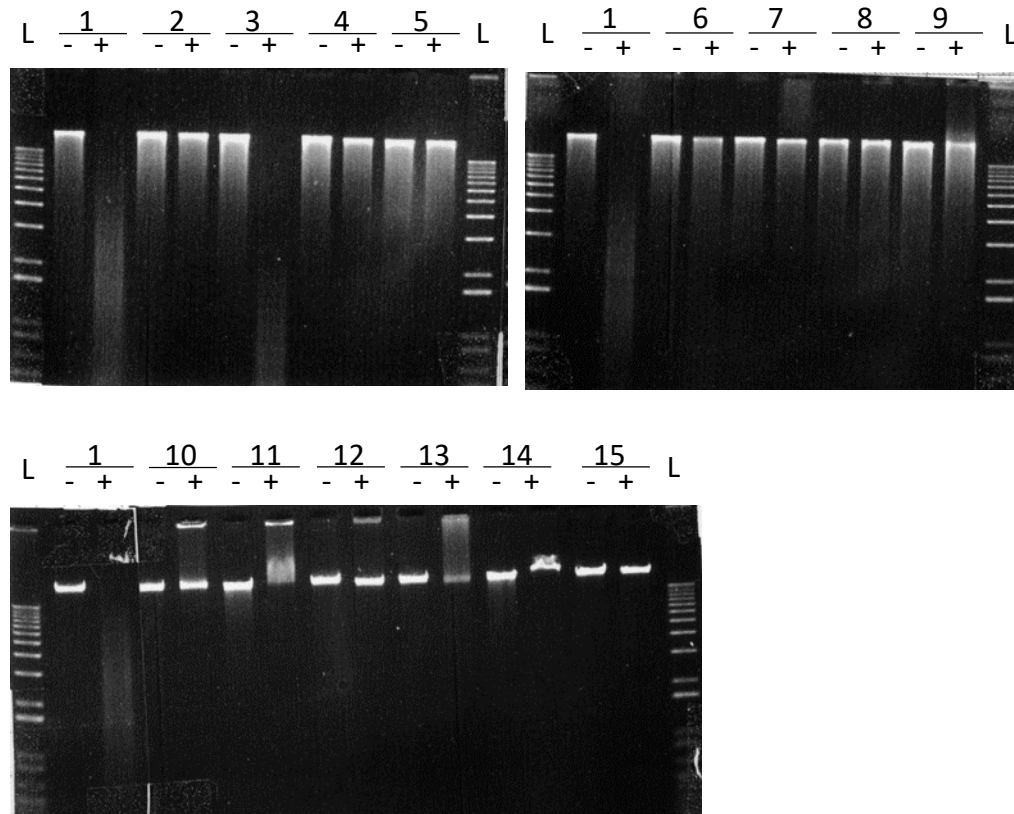

| N°   | Enzyme    | Motif       |
|------|-----------|-------------|
| 1*   | BclI      | CCATC       |
| 2    | HinfA     | GANTC       |
| 3**  | DpnI      | GATC        |
| 4*** | MboI      | GATC        |
| 5    | Hpy188III | TCNNGA      |
| 6    | HhaI      | GCGC        |
| 7    | Hpy166II  | GTNNAC      |
| 8    | AseI      | ATTAAT      |
| 9    | TaqI      | TCGA        |
| 10   | NlaIII    | CATG        |
| 11   | MnII      | GAGG/CCTC   |
| 12   | HpyCh4IV  | ACGT        |
| 13   | DdeI      | CTNAG       |
| 14   | MboII     | GAAGG/TCTTC |
| 15   | HaeIII    | GGCC        |

**Figure S3.** Restriction analysis of H1 genome using commercially available restriction endonucleases. Isolated gDNA from the strain H1 was digested (+) with different restriction enzymes. gDNA without enzyme (-) were used as negative control. H1 was resistant to all the tested enzymes as predicted. L: 1 kb ladder. \* BclI enzyme was used as control since H1 is sensitive to cleavage by this enzyme. \*\* The DpnI enzyme cleaves methylated GATC motifs. \*\*\* The MboI enzyme cuts unmethylated GATC motifs.
