# Supplementary material for: In Vivo Genome and Methylome Adaptation of cag-Negative Helicobacter pylori during Experimental Human Infection
Source: PubMed Central journal article supplement (PMC7448279; doi:10.1128/mbio.01803-20), 2020-08-25
Supplement: mBio.01803-20-sf004.pdf [file mBio.01803-20-sf004.pdf]

**A)**

| Strain  | H1-H16 | 8A3 | 8C10 | 12A3 | 12C8 | 29A2 | 29C8 | 48A2 | 48C8 | 78A3 | 78C8 | 81A1 | 81C9 | 87A3 | 87C7 | 103A4 | 103C8 | 119A2 | 119C10 | 125A3 | 125C7 |
|---------|--------|-----|------|------|------|------|------|------|------|------|------|------|------|------|------|-------|-------|-------|--------|-------|-------|
| G-tract | 9      | 9   | 9    | 13   | 13   | 9    | 8    | 9    | 9    | 9    | 9    | 13   | 13   | 9    | 12   | 9     | 9     | 9     | 9      | 9     | 9     |

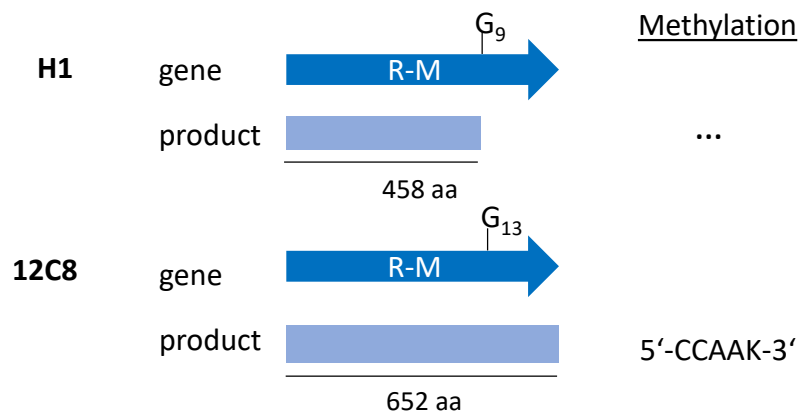

**B)**

| Strain  | H1-H16 | 8A3 | 8C10 | 12A3 | 12C8 | 29A2 | 29C8 | 48A2 | 48C8 | 78A3 | 78C8 | 81A1 | 81C9 | 87A3 | 87C7 | 103A4 | 103C8 | 119A2 | 119C10 | 125A3 | 125C7 |
|---------|--------|-----|------|------|------|------|------|------|------|------|------|------|------|------|------|-------|-------|-------|--------|-------|-------|
| G-tract | 12     | 12  | 12   | 13   | 13   | 12   | 12   | 12   | 13   | 12   | 12   | 13   | 13   | 12   | 13   | 12    | 12    | 12    | 12     | 12    | 12    |

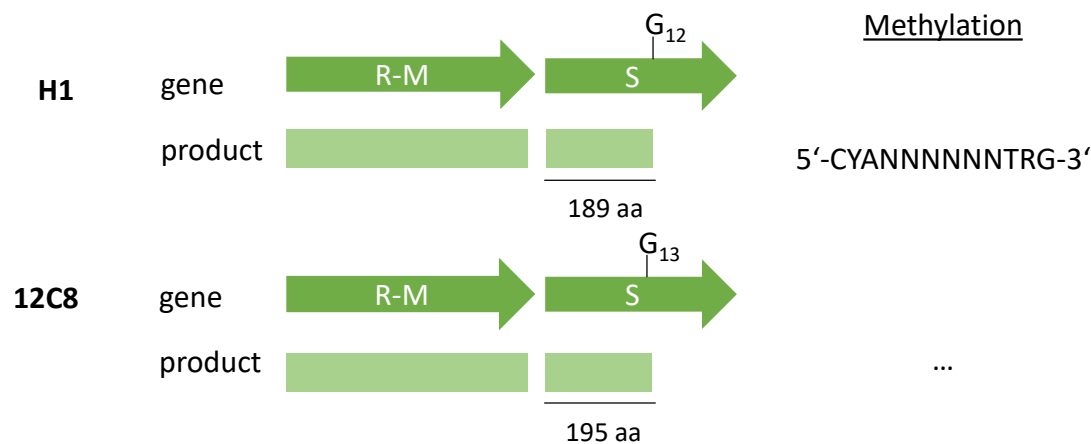

**Figure S4.** Number of nucleotides within the homopolymeric tracts of the phase-variable R-M systems and graphical representation. (a) R-M system methylating the motif CCAA<sub>K</sub>. The reisolates with 13 Gs within the homopolymeric tract (highlighted in blue) have an active R-M system. (b) Graphical representation of the R-M system and the S subunit methylating CYANNNNNNTRG. The reisolates with 13 Gs within the homopolymeric tract do not have an active R-M system and therefore, the CYAN<sub>6</sub>TRG motif is not methylated in those reisolates (green in the panel).
