# Supplementary material for: In Vivo Genome and Methylome Adaptation of cag-Negative Helicobacter pylori during Experimental Human Infection
Source: PubMed Central journal article supplement (PMC7448279; doi:10.1128/mbio.01803-20), 2020-08-25
Supplement: mBio.01803-20-st001.pdf [file mBio.01803-20-st001.pdf]

**Table S1.** List of *H. pylori* reisolates used in this study and histology scores at the time of *H. pylori* culture from challenged human volunteers (table modified from (Aebischer, Bumann et al. 2008)).

| Isolates |        | 1 <sup>st</sup> Gastroscopy<br>(before challenge) |        | 2 <sup>nd</sup> Gastroscopy<br>(6 wpc <sup>a</sup> ) |        | 3 <sup>rd</sup> Gastroscopy<br>(10 wpc <sup>a</sup> ) |        |
|----------|--------|---------------------------------------------------|--------|------------------------------------------------------|--------|-------------------------------------------------------|--------|
| Antrum   | Corpus | Antrum                                            | Corpus | Antrum                                               | Corpus | Antrum                                                | Corpus |
| 12A3     | 12C8   | 2                                                 | 2      | 7                                                    | 4      | 7                                                     | 3      |
| 48A2     | 48C8   | 0                                                 | 0      | 4                                                    | 5      | 9                                                     | 5      |
| 78A3     | 78C8   | 1                                                 | 1      | 7                                                    | 3      | 7                                                     | 3      |
| 87A3     | 87C7   | 2                                                 | 1      | 7                                                    | 3      | 5                                                     | 3      |
| 119A2    | 119C10 | 0                                                 | 0      | 4                                                    | 2      | 8                                                     | 2      |
| 8A3      | 8C10   | 2                                                 | 1      | 4                                                    | 1      | 6                                                     | 4      |
| 29A2     | 29C8   | 2                                                 | 2      | 8                                                    | 8      | 10                                                    | 7      |
| 81A1     | 81C9   | -                                                 | -      | 8                                                    | 3      | 5                                                     | 3      |
| 103A4    | 103C8  | 2                                                 | 1      | 12                                                   | 11     | 3                                                     | 2      |
| 125A3    | 125C7  | 0                                                 | 0      | 7                                                    | 10     | 7                                                     | 6      |

<sup>a</sup>wpc: weeks post challenge

Reisolates from human volunteers given a Ty21a (pUreA/B) vaccine candidate are shown in green and reisolates from human volunteers given the control are highlighted in yellow.
