# Supplementary material for: In Vivo Genome and Methylome Adaptation of cag-Negative Helicobacter pylori during Experimental Human Infection
Source: PubMed Central journal article supplement (PMC7448279; doi:10.1128/mbio.01803-20), 2020-08-25
Supplement: mBio.01803-20-st002.pdf [file mBio.01803-20-st002.pdf]

**Table S2.** Oligonucleotides (Table S2A) and recombinant bacterial strains (Table S2B) used in this study.

| <b>Table S2A</b>       |                                       |                       |                                                                                     |
|------------------------|---------------------------------------|-----------------------|-------------------------------------------------------------------------------------|
| <b>Primer</b>          | <b>5' → 3' sequence</b>               | <b>RS<sup>a</sup></b> | <b>Application</b>                                                                  |
| <b>Methylome study</b> |                                       |                       |                                                                                     |
| H1_RM-2_PstI_for       | atactgcagATGTTTGAATGGCAACCG           | PstI                  | Insertion mutagenesis of the target putative R-M system (not assigned to any motif) |
| H1_RM-2_OL1_rev        | cggatcggacagtgcATTCCAGCAATAAGTTGTCT   | -                     |                                                                                     |
| H1_RM-2_OL2_for        | gctcggtagccttgcACTCGAAGCCCTAATTTCAA   | -                     |                                                                                     |
| H1_RM-2_BamHI_rev      | ataggatccATGTATCTTCGTTAATATCGC        | BamHI                 |                                                                                     |
| H1_MTase3_PstI_for     | atactgcagTGCTAAAAGAATATTTAGAAAG       | PstI                  | Insertion mutagenesis of the target putative MTase (not assigned to any motif)      |
| H1_MTase3_OL1_rev      | cggatcggacagtgcTCTTTAGCGTTAGTGATAGG   | -                     |                                                                                     |
| H1_MTase3_OL2_for      | gctcggtagccttgcAGCCAAAACGATTTGAAT     | -                     |                                                                                     |
| H1_MTase3_BamHI_rev    | ataggatccATTGGGTGTTTTAGGGTTTG         | BamHI                 |                                                                                     |
| H1_RM-4_PstI_for       | atactgcagATGGGTGGGCTTTGTATAAT         | PstI                  | Insertion mutagenesis of the target R-M system (M.HpyH1XX and HpyH1XXP)             |
| H1_RM-4_OL1_rev        | cggatcggacagtgcATCCTTATAATTCGTTTCGCT  | -                     |                                                                                     |
| H1_RM-4_OL2_for        | gctcggtagccttgcACACAAAACAAAACAACT     | -                     |                                                                                     |
| H1_RM-4_BamHI_rev      | ataggatccTCCTATAATCATCCGGCACT         | BamHI                 |                                                                                     |
| H1_RM-1_PstI_for       | atactgcagATGCAAAATAAGAAATTTGTG        | PstI                  | Insertion mutagenesis of the target R-M system (M.HpyH1I and HpyH1IP)               |
| H1_RM-1_OL1_rev        | cggatcggacagtgcATTCTTGATATAATCCAGCT   | -                     |                                                                                     |
| H1_RM-1_OL2_for        | gctcggtagccttgcACGACGATTAACAAACAGAA   | -                     |                                                                                     |
| H1_RM-1_BamHI_rev      | ataggatccATTAATCAACGCGCTTAATT         | BamHI                 |                                                                                     |
| H1_RM-1_seq_for        | AGTTTTATGCTGGCGGATTG                  | -                     | Sequencing of the G homopolymeric tract in M.HpyH1I                                 |
| H1_RM-1_seq_rev        | AAGCAAGTTATAGGGGTGGT                  | -                     |                                                                                     |
| H1_RM-5_For/PstI       | atactgcagAACAGCTTATTAGAAAACGCA        | PstI                  | Insertion mutagenesis of the target R-M system (HpyH1II)                            |
| H1_RM-5_rev/OL1        | cggatcggacagtgcTCCTCTAAATCGTGTAAGAAT  | -                     |                                                                                     |
| H1_RM-5_for/OL2        | gctcggtagccttgcTATTGCAACACGATCCGAT    | -                     |                                                                                     |
| H1_RM-5_rev/BamHI      | ataggatccTGAGGTGGTAGAGCTGATA          | BamHI                 |                                                                                     |
| H1_S6_PstI_for         | atactgcagAACTCTACAAGACTACGCAA         | PstI                  | Insertion mutagenesis of the target putative S subunit (not assigned to any motif)  |
| H1_S6_OL1_rev          | cggatcggacagtgcAGAACCTTGACTGCCTGAA    | -                     |                                                                                     |
| H1_S6_OL2_for          | gctcggtagccttgcACAACCACAAAATCAATGAG   | -                     |                                                                                     |
| H1_S6_BamHI_rev        | ataggatccAGGTCTTATTACCATCGCAT         | BamHI                 |                                                                                     |
| H1_S7_PstI_For         | atactgcagATGGACGCATTAATGCTGC          | PstI                  | Insertion mutagenesis of the target putative S subunit (not assigned to any motif)  |
| H1_S7_OL1_rev          | cggatcggacagtgcATGACTGCCTACCAATAGT    | -                     |                                                                                     |
| H1_S7_OL2_for          | gctcggtagccttgcATGTGAAATGGAATACAGAGCA | -                     |                                                                                     |
| H1_S7_BamHI_rev        | ataggatccAGCGCTCATTAATTCGTGGT         | BamHI                 |                                                                                     |
| H1_HP1471_seq_for      | ACATGCTAGGGTATTTTCTC                  | -                     | Sequencing of the G homopolymeric tract in the target S subunit Bcgl like protein   |
| H1_HP1471_seq_rev      | AGATTAACCTCGTCTCTACT                  | -                     |                                                                                     |
| H1_HP1471/for          | ATTTGTCATCACTGCAGG                    | -                     |                                                                                     |
| H1_HP1471/rev          | TAGCTTGATTTTAGCGC                     | -                     |                                                                                     |
| <b>Genome study</b>    |                                       |                       |                                                                                     |
| H1_HP1560_seq_for      | AACTTACACCACGGTGGT                    | -                     | Sequencing of the homopolymeric tract within the target gene                        |
| H1_HP1560_seq_rev      | ATTATGCATGGCATTGCTTG                  | -                     |                                                                                     |
| H1_HP1560/for          | ATGACTACAGACAAAAGCCT                  | -                     |                                                                                     |
| H1_HP1560/rev          | AAGCGGTTAGCGATCCTA                    | -                     |                                                                                     |
| H1_hp0164_seq_for      | ACGAATTTGACAATTGCATC                  | -                     | Sequencing of the homopolymeric tract within the target gene                        |
| H1_hp0164_seq_rev      | ATCCCTTCATTCCGCTTA                    | -                     |                                                                                     |
| H1_hp0164/for          | AGTTTATTGCCCTTAAGAGA                  | -                     |                                                                                     |
| H1_hp0164/rev          | TTTCTTCAACCCACAAT                     | -                     |                                                                                     |
| H1_HP0770_seq_for      | AGAAGAAAAAACCGAACT                    | -                     | Sequencing of the homopolymeric tract within the target gene                        |
| H1_HP0770_seq_rev      | TTAGCCTTAGGGATTTCCT                   | -                     |                                                                                     |
| H1_HP0770/for          | ATGGCTGAAGAAGAAAAAACCC                | -                     |                                                                                     |
| H1_HP0770/rev          | ATGGGTAGGGTTAGTAACCA                  | -                     |                                                                                     |
| H1_HP0058_for          | CTGACTAACAAAAACTGA                    | -                     | Amplification of the target genes                                                   |
| H1_HP0058_rev          | TTATGATCCCATATCCACG                   | -                     |                                                                                     |
| H1_jhp0562_for         | TTGGATACGGAAAACTCGT                   | -                     |                                                                                     |
| H1_jhp0562_rev         | ACTTTCTGGGTTTAATTGAT                  | -                     |                                                                                     |
| H1_HP0503_for          | TTGATTAACCTAAACATTT                   | -                     | re-sequencing of the homopolymeric C tract of                                       |
| H1_HP0503_rev          | TTAATCAAACCTACAAGGGT                  | -                     |                                                                                     |

|                     |                          |   |                                                              |
|---------------------|--------------------------|---|--------------------------------------------------------------|
| H1_HP0503_seqfor    | TATTTAGTGGATTGCGCTTA     | - | the target gene (GTAC Mtase gene)                            |
| H1_HP0503_seqrev    | ATTTATCCACATAATTGGCTA    | - |                                                              |
| H1_jhp0562_1_for    | ATGTAGCATTAGAGTCTAAT     | - |                                                              |
| H1_jhp0562_2_rev    | ACTTGTATCAAATGAACTCCT    | - | Check deletion in 29C8                                       |
| H1_jhp0562_3_for    | AGAATAAGAAGGTGTATAAAG    | - |                                                              |
| H1_jhp0562_4_rev    | CTTTATCCAATTCATACTTGATAT | - |                                                              |
| H1_frpB-hp0874_for  | ACAATGAGTTTAAAGTAACTTC   | - | Check deletion in 103C8                                      |
| H1_frpB-hp0874_rev  | ATCGCTAGCTATCAATTGAA     | - |                                                              |
| H1_HP1472_for1      | ATTCGCACAAACTCACTAA      | - |                                                              |
| H1_HP1472_rev1      | ATAAGAAAAGGTAATCGGCTAT   | - | Sequencing of the homopolymeric tract within the target gene |
| H1_HP1472_for2      | ATGTTTTTCGCTAGCCACCAC    | - |                                                              |
| H1_HP1472_rev2      | TCAATATAGATCGTTTCTAAAT   | - |                                                              |
| H1_upHP0897_for     | ATTCCAAATGTCCAATGAATGT   | - | Check deletion in 29C8                                       |
| H1_HP1241_rev       | ATCTGAGCACGCTTAAGTCA     | - |                                                              |
| jhp0562_1_for       | ATTCGTTCAAGAGCTTTATGA    | - |                                                              |
| jhp0562_2_rev       | TAACCGCCGTAGTAGAAAC      | - | Sequencing of the target gene                                |
| jhp0562_seq3_for    | AGAGTTATTGCCCAAGAATTA    | - |                                                              |
| jhp0562_seq4_rev    | AGGTCTCTTTAATGTTTGCCT    | - |                                                              |
| SangSeq_H1_oppA_for | ATGCAAGGTTTTTCTTCA       | - | Sequencing of the target gene                                |
| SangSeq_H1_oppA_rev | AAGTGAACATAACGGCT        | - |                                                              |
| SangSeq_H1_oppB_for | ATATCACTTTGCCGTTCT       | - | Sequencing of the target gene                                |
| SangSeq_H1_oppB_rev | TATCAAACCTCGCTACAAA      | - |                                                              |
| SangSeq_H1_oppC_for | TATAACGATCCTTATGTGA      | - | Sequencing of the target gene                                |
| SangSeq_H1_oppC_rev | TAGAAATCACAATGAGTAA      | - |                                                              |
| SangSeq_H1_oppD_for | ATCGTTACCCTTATGAATT      | - | Sequencing of the target gene                                |
| SangSeq_H1_oppD_rev | TTGCAAGTAATAAACGCTA      | - |                                                              |
| Check-oppA_For      | ATAACGCTCCCATTTTAGC      | - | Check 633bp insertion in oppA in H16                         |
| Check-oppA_Rev      | ACGCATAAATAGAATTGCTA     | - |                                                              |
| Check_oppD_For      | ACATCGGTATCATTGGCGA      | - | Check 57bp insertion in oppD in H4                           |
| Check_oppD_Rev      | AGGGTAAGCAAAGCGTAAAG     | - |                                                              |
| Check-oppA_For2     | AGGCTACGCCTTATTTATA      | - | Check 633bp insertion in oppA in H16                         |
| Check-oppA_Rev2     | TAGAGATCCCTGCATAATT      | - |                                                              |
| Check_oppD_For2     | AGTTTTAAACGCCATGCAG      | - | Check 57bp insertion in oppD in H4                           |
| Check_oppD_Rev2     | TCTAAAGCAGAAGTGGGCTC     | - |                                                              |
| qPCR_H1_KatA_for    | AGCATTCAAGTGATGCCCGA     | - | Measure <i>katA</i> expression by qPCR                       |
| qPCR_H1_KatA_rev    | AACAACATTAGCCGGAGTGA     | - |                                                              |
| HPefpF02            | GGGCTTGAAAATTGAATTGGGCGG | - | Amplification of the <i>efp</i> target gene                  |
| HPefpR01            | GTATTGACTTTAATGATCTCACCC | - |                                                              |

<sup>a</sup>RS: Restriction site

**Table S2B**

| <b><i>Escherichia coli</i></b>    |             |                   |                                               |                                    |                      |
|-----------------------------------|-------------|-------------------|-----------------------------------------------|------------------------------------|----------------------|
| <b>Strain</b>                     | <b>Code</b> | <b>Plasmid</b>    | <b>Vector</b>                                 | <b>Genotype</b>                    | <b>Ab Resistance</b> |
| <i>E. coli</i> MC1061             | Eco1447     | pSUS3407          | pUC19 derivative                              | candidate RM-1 + aphA3 cassette    | Amp, Km              |
| <i>E. coli</i> MC1061             | Eco1448     | pSUS3408          | pUC19 derivative                              | candidate RM-2 + aphA3 cassette    | Amp, Km              |
| <i>E. coli</i> MC1061             | Eco1446     | pSUS3409          | pUC19 derivative                              | candidate MTase-3 + aphA3 cassette | Amp, Km              |
| <i>E. coli</i> MC1061             | Eco1449     | pSUS3410          | pUC19 derivative                              | candidate RM-4 + aphA3 cassette    | Amp, Km              |
| <i>E. coli</i> MC1061             | Eco1519     | pSUS3415          | pUC19 derivative                              | candidate RM-5 + aphA3 cassette    | Amp, Km              |
| <i>E. coli</i> MC1061             | Eco1543     | pSUS3417          | pUC19 derivative                              | candidate S6 + aphA3 cassette      | Amp, Km              |
| <i>E. coli</i> MC1061             | Eco1544     | pSUS3418          | pUC19 derivative                              | candidate S7 + aphA3 cassette      | Amp, Km              |
| <b><i>Helicobacter pylori</i></b> |             |                   |                                               |                                    |                      |
| <b>Strain</b>                     | <b>Code</b> | <b>Genotype</b>   | <b>Transformed with plasmic Ab Resistance</b> |                                    |                      |
| <i>H. pylori</i> BCS100-H1        | Bac725      | H1 RM-2::aphA3    | pSUS3408                                      | Km                                 |                      |
| <i>H. pylori</i> BCS100-H1        | Bac726      | H1 MTase-3::aphA3 | pSUS3409                                      | Km                                 |                      |
| <i>H. pylori</i> BCS100-H1        | Bac727      | H1 RM-4::aphA3    | pSUS3410                                      | Km                                 |                      |
| <i>H. pylori</i> 12C8             | Bac728      | 12C8 RM-1::aphA3  | pSUS3407                                      | Km                                 |                      |
| <i>H. pylori</i> BCS100-H1        | Bac732      | H1 RM-5::aphA3    | pSUS3415                                      | Km                                 |                      |
| <i>H. pylori</i> BCS100-H1        | Bac733      | H1 S6::aphA3      | pSUS3417                                      | Km                                 |                      |
| <i>H. pylori</i> BCS100-H1        | Bac734      | H1 S7::aphA3      | pSUS3418                                      | Km                                 |                      |
