# Supplementary material for: In Vivo Genome and Methylome Adaptation of cag-Negative Helicobacter pylori during Experimental Human Infection
Source: PubMed Central journal article supplement (PMC7448279; doi:10.1128/mbio.01803-20), 2020-08-25
Supplement: mBio.01803-20-st003.pdf [file mBio.01803-20-st003.pdf]

**Table S3.** SNPs (Table S3A), and CNPs (Table S3B) within the BCS 100 strain (clones H1-H16), and CNPs within the reisolates (Table S3C). The SMRT-sequenced genome of clone H1 was used as a reference for the genome alignments.

| Table S3A |               |        |          |                |                                 |                                        |
|-----------|---------------|--------|----------|----------------|---------------------------------|----------------------------------------|
| #         | Position (H1) | Strain | SNP type | Reference (H1) | Modification in clone/reisolate | Gene                                   |
| 1         | 32823         | H2     | non syn  | G              | A                               | copA                                   |
|           |               | H9     |          |                |                                 |                                        |
| 119A2     |               |        |          |                |                                 |                                        |
| 2         | 32899         | H12    | non syn  | C              | T                               | copA                                   |
| 3         | 197061        | H7     | syn      | A              | G                               | vacA                                   |
| 4         | 297230        | H3     | non syn  | C              | T                               | multidrug efflux transporter           |
|           |               | 8A3    |          |                |                                 |                                        |
|           |               | 8C10   |          |                |                                 |                                        |
|           |               | 29A2   |          |                |                                 |                                        |
|           |               | 29C8   |          |                |                                 |                                        |
|           |               | 125A2  |          |                |                                 |                                        |
| 125C7     |               |        |          |                |                                 |                                        |
| 5         | 714504        | H2     | non syn  | G              | T                               | dnaX                                   |
|           |               | H3     |          |                |                                 |                                        |
|           |               | H4     |          |                |                                 |                                        |
|           |               | H5     |          |                |                                 |                                        |
|           |               | H6     |          |                |                                 |                                        |
|           |               | H7     |          |                |                                 |                                        |
|           |               | H8     |          |                |                                 |                                        |
|           |               | H9     |          |                |                                 |                                        |
|           |               | H10    |          |                |                                 |                                        |
|           |               | H11    |          |                |                                 |                                        |
|           |               | H13    |          |                |                                 |                                        |
| H14       |               |        |          |                |                                 |                                        |
| H15       |               |        |          |                |                                 |                                        |
| H16       |               |        |          |                |                                 |                                        |
| 6         | 786947        | H11    | non syn  | T              | G                               | Type I RM system, S subunit II         |
| 7         | 786955        | H5     | non syn  | T              | G                               | Type I RM system, S subunit II         |
| 8         | 786967        | H15    | non syn  | T              | C                               | Type I RM system, S subunit II         |
| 9         | 841716        | H13    | non syn  | A              | C                               | Type I RM system, S subunit II         |
| 10        | 841813        | H5     | non syn  | A              | C                               | Type I RM system, S subunit II         |
| 11        | 896412        | H13    | non syn  | C              | T                               | oppB                                   |
| 12        | 1211526       | H9     | syn      | G              | A                               | oppC                                   |
| 13        | 1211970       | H5     | non syn  | G              | A                               | oppC                                   |
| 14        | 1424010       | H7     | syn      | T              | G                               | adenine specific DNA methyltransferase |
|           |               | H11    |          |                |                                 |                                        |
| 15        | 1487697       | H3     | non syn  | G              | A                               | pdxJ                                   |
|           |               | 8A3    |          |                |                                 |                                        |
|           |               | 8C10   |          |                |                                 |                                        |
|           |               | 29A2   |          |                |                                 |                                        |
|           |               | 29C8   |          |                |                                 |                                        |
|           |               | 48A2   |          |                |                                 |                                        |
| 48C8      |               |        |          |                |                                 |                                        |
| 125A2     |               |        |          |                |                                 |                                        |
| 125C7     |               |        |          |                |                                 |                                        |
| 16        | 1489146       | H5     | non syn  | A              | G                               | wecA                                   |
|           |               | H6     |          |                |                                 |                                        |
|           |               | H10    |          |                |                                 |                                        |
|           |               | H13    |          |                |                                 |                                        |
| H14       |               |        |          |                |                                 |                                        |

| # | Position in H1 |        | Strain | CNP                                 | Length (bp) | Gene                        |
|---|----------------|--------|--------|-------------------------------------|-------------|-----------------------------|
|   | Start          | End    |        |                                     |             |                             |
| 1 | 841827         | 841879 | H16    | 3 SNPs (2 non syn + 1 syn)          | 53          | Type I RM system, S subunit |
| 2 | 841812         | 841817 | H11    | 2 SNPs (1 non syn + 1 stop)         | 5           | Type I RM system, S subunit |
| 3 | 841699         | 841812 | H14    | 3 SNPs (1 non syn + 1 syn + 1 stop) | 114         | Type I RM system, S subunit |
| 4 | 787019         | 787023 | H14    | 2 SNPs (1 non syn + 1 syn)          | 5           | Type I RM system, S subunit |

| H1 coordinates | Strain | Type of modification         | Length (bp) | N° of modifications | Gene                  | Locus_tag in 26695 (HP) or J99 (JHP) |            |
|----------------|--------|------------------------------|-------------|---------------------|-----------------------|--------------------------------------|------------|
|                |        |                              |             |                     |                       |                                      | Start      |
| 2E+05          | 231645 | 12A3, 12C8, 81A1, 81C9       | CNP         | 502                 | 8 SNP                 | omp28, babA                          | HP1243     |
| 3E+05          | 304469 | 12A3, 12C8, 81A1, 81C9, 87C7 | CNP         | 17                  | 4 SNP                 | omp27, hopQ                          | HP1177     |
| 5E+05          | 485650 | 12A3, 12C8, 81A1, 81C9, 87C7 | CNP         | 37                  | 3 SNP                 | omp, hofC                            | HP0486     |
| 6E+05          | 607673 | 29C8                         | CNP         | 95                  | 8 SNP                 | LPS biosynthesis protein             | JHP0562    |
| 7E+05          | 710655 | 12A3, 12C8, 81A1, 81C9, 87C7 | CNP         | 21                  | 3 SNP                 | -                                    | intergenic |
| 8E+05          | 841763 | 12A3, 12C8, 81A1, 81C9, 87C7 | CNP         | 25                  | 6 SNP                 | type I hsdS                          | HP0848     |
| 9E+05          | 887376 | 12A3, 12C8, 81A1, 81C9, 87C7 | CNP         | 223                 | 10 SNP                | omp19, babB                          | HP0896     |
| 9E+05          | 888770 | 12A3, 12C8, 81A1, 81C9, 87C7 | CNP         | 418                 | 5 SNP + 3 bp deletion | omp19, babB                          | HP0896     |

Unique CNP is highlighted in grey
