# Supplementary material for: In Vivo Genome and Methylome Adaptation of cag-Negative Helicobacter pylori during Experimental Human Infection
Source: PubMed Central journal article supplement (PMC7448279; doi:10.1128/mbio.01803-20), 2020-08-25
Supplement: mBio.01803-20-st004.pdf [file mBio.01803-20-st004.pdf]

**Table S4.** Modifications affecting Opp system components within BCS 100 (clones H1-H16) and reisolates (Table S4A) and opp gene status in 75 diverse *H. pylori* genomes (Table S4B).

| <b>Table S4A<sup>a</sup></b> |             |                       |                    |                       |                                |
|------------------------------|-------------|-----------------------|--------------------|-----------------------|--------------------------------|
| <b><i>oppA</i></b>           |             |                       |                    |                       |                                |
| <b>Start</b>                 | <b>Stop</b> | <b>Strain</b>         | <b>Description</b> | <b>Reference (H1)</b> | <b>Modification in isolate</b> |
| 897283                       | 897283      | H16                   | Insertion          | -                     | 633 bp                         |
| 897439                       | 897445      | 103A4                 | Indel              | 7T                    | 6T                             |
| <b><i>oppB</i></b>           |             |                       |                    |                       |                                |
| <b>Start</b>                 | <b>Stop</b> | <b>Strain</b>         | <b>Description</b> | <b>Reference (H1)</b> | <b>Modification in isolate</b> |
| 896412                       | 896412      | H13                   | SNP (non-syn)      | G                     | A                              |
| <b><i>oppC</i></b>           |             |                       |                    |                       |                                |
| <b>Start</b>                 | <b>Stop</b> | <b>Strain</b>         | <b>Description</b> | <b>Reference (H1)</b> | <b>Modification in isolate</b> |
| 1211526                      | 1211526     | H9                    | SNP (syn)          | G                     | A                              |
| 1211560                      | 1211567     | H11                   | Indel              | 8A                    | 7A                             |
| 1211858                      | 1211864     | H2                    | Indel              | 7C                    | 8C                             |
| 1211858                      | 1211864     | 119C10                | Indel              | 7C                    | 8C                             |
| 1211885                      | 1211885     | H5                    | SNP (non-syn)      | G                     | A                              |
| 1211998                      | 1211998     | 119A2                 | SNP (non-syn)      | G                     | A                              |
| <b><i>oppD</i></b>           |             |                       |                    |                       |                                |
| <b>Start</b>                 | <b>Stop</b> | <b>Strain</b>         | <b>Description</b> | <b>Reference (H1)</b> | <b>Modification in isolate</b> |
| 1213130                      | 1213135     | H2-16, all reisolates | Indel              | 6A                    | 7A                             |
| 1213476                      | 1213476     | 125A2                 | SNP (non-syn)      | G                     | A                              |
| 1213495                      | 1213495     | H4                    | Insertion          | -                     | 57 bp                          |
| 1213737                      | 1213737     | 78A3                  | Stop               | G                     | A                              |
| 1213789                      | 1213789     | 87A3                  | SNP (non-syn)      | G                     | A                              |
| 1214054                      | 1214056     | H15                   | Indel              | 3C                    | 2C                             |

<sup>a</sup>Strain H1 was used as reference genome, Start and Stop positions refer to H1

Table S4B<sup>b</sup>

| #  | Accession number | Strain ID   | <i>oppA</i> | <i>oppB</i> | <i>oppC</i> | <i>oppD</i> |
|----|------------------|-------------|-------------|-------------|-------------|-------------|
| 1  | NC_000915.1      | 26695       | +           | +           | +           | +           |
| 2  | NC_008086.1      | HPAG1       | -           | +           | +           | +           |
| 3  | NC_014256.1      | B8          | +           | +           | +           | +           |
| 4  | NZ_CP007606.1    | BM013B      | +           | +           | +           | +           |
| 5  | NZ_CP007604.1    | BM013A      | +           | +           | +           | +           |
| 6  | NC_017741.1      | Shi112      | +           | +           | +           | +           |
| 7  | NC_017367.1      | F57         | +           | +           | +           | +           |
| 8  | NC_017379.1      | Puno135     | +           | +           | -           | +           |
| 9  | NZ_CP007603.1    | J166        | +           | +           | +           | +           |
| 10 | NZ_CP006827.1    | oki898      | +           | +           | +           | +           |
| 11 | NC_017362.1      | Lithuania75 | +           | +           | +           | +           |
| 12 | NC_022911.1      | BM012S      | +           | +           | +           | +           |
| 13 | NC_022886.1      | BM012A      | +           | +           | +           | +           |
| 14 | NZ_CP006824.1    | oki422      | -           | +           | +           | +           |
| 15 | NZ_AP014712.1    | ML3         | +           | +           | +           | +           |
| 16 | NZ_CP006821.1    | oki112      | +           | +           | +           | +           |
| 17 | NC_017375.1      | 83          | +           | +           | +           | +           |
| 18 | NC_017360.1      | 35A         | +           | +           | -           | +           |
| 19 | NZ_CP011484.1    | CC33C       | +           | +           | +           | +           |
| 20 | NZ_CP006820.1    | oki102      | +           | +           | +           | +           |
| 21 | NZ_CP007605.1    | BM012B      | +           | +           | +           | +           |
| 22 | NC_017359.1      | Sat464      | -           | +           | +           | +           |
| 23 | NC_011333.1      | G27         | -           | +           | +           | +           |
| 24 | NC_017355.1      | v225d       | +           | +           | +           | +           |
| 25 | NC_017926.1      | XZ274       | -           | +           | +           | +           |
| 26 | NZ_CP010013.1    | Hp238       | +           | +           | +           | +           |
| 27 | NZ_CP011482.1    | L7          | +           | +           | +           | +           |
| 28 | NC_017378.1      | Puno120     | +           | +           | +           | +           |
| 29 | NC_017368.1      | F16         | +           | +           | +           | +           |
| 30 | NC_010698.2      | Shi470      | +           | +           | +           | +           |
| 31 | NZ_AP014710.1    | ML1         | +           | +           | -           | +           |
| 32 | NC_017382.1      | 51          | +           | +           | +           | +           |
| 33 | NZ_CP006826.1    | oki828      | +           | +           | +           | +           |
| 34 | NC_019560.1      | Aklavik117  | +           | +           | +           | +           |
| 35 | NC_017358.1      | Cuz20       | +           | +           | +           | +           |
| 36 | NC_021218.3      | UM066       | +           | +           | +           | +           |
| 37 | NC_017739.1      | Shi417      | +           | +           | +           | +           |
| 38 | NZ_CP011483.1    | DU15        | +           | +           | +           | +           |
| 39 | NC_012973.1      | B38         | +           | +           | -           | +           |
| 40 | NC_017366.1      | F32         | +           | +           | +           | +           |
| 41 | NC_014560.1      | SJM180      | +           | +           | +           | +           |
| 42 | NC_017740.1      | Shi169      | +           | +           | +           | +           |
| 43 | NC_017063.1      | ELS37       | +           | +           | +           | +           |
| 44 | NZ_CP006823.1    | oki154      | +           | +           | +           | +           |
| 45 | NC_020509.1      | OK310       | +           | +           | +           | +           |
| 46 | NC_020508.1      | OK113       | +           | +           | +           | +           |
| 47 | NZ_CP006825.1    | oki673      | +           | +           | +           | +           |
| 48 | NZ_CP006822.1    | oki128      | +           | +           | +           | +           |
| 49 | NC_017354.1      | 52          | +           | +           | +           | +           |
| 50 | NC_021882.2      | UM298       | -           | +           | -           | +           |
| 51 | NC_021216.3      | UM299       | -           | +           | -           | +           |
| 52 | NC_021215.3      | UM032       | -           | +           | +           | +           |
| 53 | NC_019563.1      | Aklavik86   | +           | +           | +           | +           |
| 54 | NZ_CP011485.1    | ausabrJ05   | +           | +           | +           | +           |
| 55 | NC_011498.1      | P12         | +           | +           | -           | +           |
| 56 | NC_017365.1      | F30         | +           | +           | +           | +           |
| 57 | AP014711.1       | ML2         | +           | +           | +           | +           |
| 58 | NC_021217.3      | UM037       | +           | +           | +           | -           |
| 59 | NC_017742.1      | PeCan18     | +           | +           | +           | +           |

|    |               |               |   |   |   |   |
|----|---------------|---------------|---|---|---|---|
| 60 | NC_017376.1   | SNT49         | + | + | + | + |
| 61 | NZ_CP011487.1 | PNG84A        | + | + | + | + |
| 62 | NZ_CP012905.1 | 7C            | + | + | + | + |
| 63 | NZ_AP014523.1 | NY40          | + | + | + | + |
| 64 | NC_017733.1   | HUP-B14       | + | + | + | + |
| 65 | NC_017372.1   | India7        | - | + | + | + |
| 66 | NC_014555.1   | PeCan4        | - | + | + | + |
| 67 | NZ_CP012907.1 | 29CaP         | + | + | + | + |
| 68 | NC_017371.1   | Gambia94/24   | + | + | + | + |
| 69 | NC_017361.1   | SouthAfrica7  | + | + | + | + |
| 70 | NC_017357.1   | 908           | + | + | + | + |
| 71 | NC_017374.1   | 2017          | + | + | + | + |
| 72 | NC_017381.1   | 2018          | + | + | + | - |
| 73 | NZ_CP011330.1 | J99           | + | + | + | + |
| 74 | NZ_CP011486.1 | K26A1         | + | + | + | + |
| 75 | NC_022130.1   | SouthAfrica20 | + | + | + | + |

<sup>b</sup>Putatively active genes (+) and truncated (-, red).
