# Supplementary material for: In Vivo Genome and Methylome Adaptation of cag-Negative Helicobacter pylori during Experimental Human Infection
Source: PubMed Central journal article supplement (PMC7448279; doi:10.1128/mbio.01803-20), 2020-08-25
Supplement: mBio.01803-20-st005.pdf [file mBio.01803-20-st005.pdf]

**Table S5.** Genetic changes in adhesin gene *babA* observed in the reisolates from the different volunteers compared to the H1-H16 clones.

| Start  | Stop   | Strain                       | Type      | Description | Reference (H1) | Modification in isolate |
|--------|--------|------------------------------|-----------|-------------|----------------|-------------------------|
| 231370 | 231370 | 8C10                         | SNP       | * (stop)    | c              | a                       |
| 232590 | 232590 | 8A3                          | SNP       | non syn     | g              | a                       |
| 231005 | 231005 | 29A2                         | SNP       | non syn     | g              | a                       |
| 232243 | 233454 | 29C8                         | deletion  | -           | -              | 1211 bp deletion        |
| 232829 | 232834 | 103A4                        | deletion  | -           | 6a             | 5a                      |
| 230746 | 230746 | 125A2                        | deletion  | gaaaaaacat  | -              | 10 bp                   |
| 232480 | 232480 | 103C8                        | insertion | ctttt       | -              | 5 bp insert             |
| 232605 | 232605 | 12A3, 12C8, 81A1, 81C9, 87C7 | SNP       | non syn     | t              | c                       |
| 231144 | 231645 | 12A3, 12C8, 81A1, 81C9,      | CNP       | 8 SNP       | -              | -                       |
