# Supplementary material for: In Vivo Genome and Methylome Adaptation of cag-Negative Helicobacter pylori during Experimental Human Infection
Source: PubMed Central journal article supplement (PMC7448279; doi:10.1128/mbio.01803-20), 2020-08-25
Supplement: mBio.01803-20-st006.pdf [file mBio.01803-20-st006.pdf]

**Table S6.** MTase genes in strain BCS 100 and reisolates, and their cognate REase and S subunits genes.

| Number of R-M systems | Position within H1 genome |         | Type of enzyme | Specificity <sup>a</sup> | Modified base | Type of R-M system | Assignment   | <i>H. pylori</i> ortholog enzymes | Comment                                                                                       |                |
|-----------------------|---------------------------|---------|----------------|--------------------------|---------------|--------------------|--------------|-----------------------------------|-----------------------------------------------------------------------------------------------|----------------|
| 1                     | 6944                      | 8898    | M              | CCA <b>A</b> K           | m6A           | Type III           | M.HpyH1I     | -                                 | Novel phase variable MTase gene. Motif not found before. Methylated in 12A3, 12C8, 81A1, 81C9 |                |
|                       | 8901                      | 11816   | R              |                          |               |                    | HpyH1IP      |                                   |                                                                                               |                |
| 2                     | 11940                     | 15812   | RM             | GCR <b>C</b> A           | m6A           | Type IIG           | HpyH1II      | -                                 | Novel MTase gene. Motif not found before                                                      |                |
| 3                     | 62571                     | 64610   | RM             | CYANNNNNN <u>I</u> RG    | m6A           | Type IIB           | HpyH1III     | HpyUM032XIII                      | Phase variable. Methylation absent in 12A3, 12C8, 48C8, 81A1, 81C9, 87C7                      |                |
|                       | 64661                     | 65229   | S1             |                          |               |                    | S1.HpyH1III  |                                   |                                                                                               |                |
|                       | 65236                     | 65836   | S2             |                          |               |                    | S2.HpyH1III  |                                   |                                                                                               |                |
| 4                     | 219029                    | 217884  | M              | G <u>I</u> NNAC          | m6A           | Type IIP           | M.HpyH1IV    | M.Hpy30IX                         |                                                                                               |                |
|                       | 219633                    | 218998  | R              |                          |               |                    | HpyH1IVP     |                                   |                                                                                               |                |
| 5                     | 264412                    | 265401  | M              | CA <u>I</u> G            | m6A           | Type IIP           | M.HpyH1V     | M.Hpy57I                          |                                                                                               |                |
| 6                     | 302568                    | 302056  | R              | <u>I</u> CNGA            | m6A           | Type IIP           | HpyH1VIP     | M.HpyUM032V                       |                                                                                               |                |
|                       | 303826                    | 302528  | M              |                          |               |                    | M.HpyH1VI    |                                   |                                                                                               |                |
| 7                     | 361489                    | 362430  | M              | G <u>C</u> GC            | m5C           | Type IIP           | M.HpyH1VII   | M.Hpy99III                        |                                                                                               |                |
| 8                     | 399176                    | 398628  | R              | <u>I</u> CNNGA           | m6A           | Type IIP           | HpyH1VIII    | HpyGI                             |                                                                                               |                |
|                       | 400138                    | 399176  | M              |                          |               |                    | M.HpyH1VIII  |                                   |                                                                                               | M.Hpy32VIII    |
| 9                     | 475250                    | 476887  | M              | A <u>I</u> TAAT          | m6A           | Type IIP           | M.HpyH1IX    | M.HpyFVII                         |                                                                                               |                |
|                       | 476853                    | 477698  | R              |                          |               |                    | HpyH1IXP     |                                   |                                                                                               | Hpy66VII       |
| 10                    | 481204                    | 482259  | M              | AC <u>G</u> T            | m5C           | Type IIP           | M.HpyH1X     | M.Hpy99XI                         |                                                                                               |                |
|                       | 482252                    | 483005  | R              |                          |               |                    | HpyH1XP      |                                   |                                                                                               | Hpy66ORF5135P  |
| 11                    | 506456                    | 507484  | M              | GT <u>A</u> C            | m6A           | Type IIP           | M.HpyH1XI    | M.HpyFXII                         |                                                                                               |                |
|                       | 507471                    | 508226  | R              |                          |               |                    | HpyH1XIP     |                                   |                                                                                               | Hpy50I         |
| 12                    | 844213                    | 845196  | M              | GGCC                     | m5C           | Type IIP           | M.HpyH1XII   | M.Hpy35ORF20746P                  |                                                                                               |                |
|                       | 845193                    | 846048  | R              |                          |               |                    | HpyH1XIIP    |                                   |                                                                                               | Hpy35ORF20746P |
| 13                    | 1143316                   | 1144425 | M              | CTNA <u>G</u>            | m6A           | Type IIP           | M.HpyH1XIII  | M.Hpy30X                          |                                                                                               |                |
|                       | 1144436                   | 1145128 | R              |                          |               |                    | HpyH1XIIIP   |                                   |                                                                                               | HpyHI          |
| 14                    | 1200899                   | 1200141 | M              | CC <u>G</u> G            | m4C           | Type IIP           | M.HpyH1XIV   | M.Hpy66IX                         |                                                                                               |                |
|                       | 1201591                   | 1200896 | R              |                          |               |                    | HpyH1XIV     |                                   |                                                                                               | Hpy299IX       |
| 15                    | 1202393                   | 1203547 | M              | <u>I</u> CGA             | m6A           | Type IIP           | M.HpyH1XV    | M.HpyFII                          |                                                                                               |                |
| 16                    | 1370586                   | 1369753 | M              | GA <u>I</u> C            | m6A           | Type IIP           | M.HpyH1XVI   | M.HpyFIII                         |                                                                                               |                |
|                       | 1371413                   | 1370580 | R              |                          |               |                    | HpyH1XVIP    |                                   |                                                                                               | HpyAIII        |
| 17                    | 1411490                   | 1412335 | M              | GAGG/CCTC                | m6A / m5C     | Type IIS           | M1.HpyH1XVII | M2.HpyAVI                         |                                                                                               |                |
|                       | 1412332                   | 1413030 | M              |                          |               |                    | M2.HpyH1XVII |                                   |                                                                                               | M1.HpyAVI      |
| 18                    | 1423592                   | 1422513 | M              | GAN <u>I</u> C           | m6A           | Type IIP           | M.HpyH1XVIII | M.HpyAIV                          |                                                                                               |                |
| 19                    | 1439225                   | 1437954 | R              | GAAGA/TCTTC              | m6A / m4C     | Type IIS           | HpyH1XIX     | HpyAII                            |                                                                                               |                |
|                       | 1440017                   | 1439241 | M1             |                          |               |                    | M1.HpyH1XIX  |                                   |                                                                                               | M1.HpyAII      |
|                       | 1440873                   | 1440010 | M2             |                          |               |                    | M2.HpyH1XIX  |                                   |                                                                                               | M2.HpyAII      |
| 20                    | 1441122                   | 1443374 | M              | GGCAA                    | m6A           | Type III           | M.HpyH1XX    | -                                 | Novel MTase                                                                                   |                |
|                       | 1443384                   | 1446275 | R              |                          |               |                    | HpyH1XXP     |                                   |                                                                                               |                |
| 21                    | 1532818                   | 1532087 | R              | <u>I</u> GCA             | m6A           | Type IIP           | HpyH1XXIP    | HpyCH4V                           |                                                                                               |                |
|                       | 1533707                   | 1532811 | M              |                          |               |                    | M.HpyH1XXI   |                                   |                                                                                               | M.HpyFVI       |
| 22                    | ?                         | ?       | ?              | VCGRAG                   | m6A           | ?                  | ?            | -                                 | MTase was not identified                                                                      |                |

<sup>a</sup> Modified base is represented in bold, and methylated base on the complementary strand is underlined.

Novel motifs and MTase genes described in this study are highlighted in grey.
